# Supplementary material for: Robust and Fast Markov Chain Monte Carlo Sampling of Diffusion MRI Microstructure Models
Source: PubMed Central journal article supplement (PMC6305549; doi:10.3389/fninf.2018.00097), 2018-12-18
Supplement: Data_Sheet_2.pdf [file Data_Sheet_2.pdf]

# Appendix

to the article

## Robust and fast Monte Carlo Markov Chain sampling of diffusion MRI microstructure models

R.L. Harms<sup>a</sup>, A. Roebroeck<sup>a</sup>

*<sup>a</sup>Dept. of Cognitive Neuroscience, Faculty of Psychology & Neuroscience, Maastricht University, the Netherlands*

### 1 MCMC priors

The priors used during MCMC sampling.

| Parameter                  | Prior                                  |
|----------------------------|----------------------------------------|
| $S_0$                      | $U(0, 1 \cdot 10^{10})$                |
| $w_i$                      | $U(0, 1)$                              |
| $d_{\parallel}$ (or $d$ )  | $U(3 \cdot 10^{-11}, 1 \cdot 10^{-8})$ |
| $d_{\perp 1}, d_{\perp 2}$ | $U(0, 1 \cdot 10^{-8})$                |
| $\theta, \phi$             | $U(0, \pi)$                            |
| $\psi$                     | $U(0, \pi)$                            |
| $\kappa$                   | $U(0, 2\pi)$                           |

Table 1: The priors  $p_i(\mathbf{x}_i)$  per model parameter. These priors are combined with the model specific parameters in table 2 to form the complete model priors. For parameter usage and specification see table 3 in the article.

| <b>Model (<math>M</math>)</b>                           | <b>Prior</b>                                                                                        |
|---------------------------------------------------------|-----------------------------------------------------------------------------------------------------|
| BallStick_in[ $n$ ],<br>CHARMED_in[ $n$ ]               | NODDI, $p_j(\mathbf{x}, M) = 1$ if $\sum_{k=0}^{n-1} w_k \leq 1$ , else<br>$p_j(\mathbf{x}, M) = 0$ |
| Tensor, CHARMED_in[ $n$ ] (extra<br>axonal compartment) | $p_j(\mathbf{x}, M) = 1$ if $d > d_{\perp 0} > d_{\perp 1}$ , else<br>$p_j(\mathbf{x}, M) = 0$      |

Table 2: The model priors  $p_j(\mathbf{x}|M)$  for model  $M$ . Each of these priors should be interpreted as a boolean, that is, they return a value of 1 if the condition is fulfilled, else they return 0. These priors are combined with the parameter specific priors in table 1 to form the complete model priors.

## 2 MCMC proposal distributions

The default proposal distributions used in MCMC sampling.

| Parameter                                    | Proposal distribution                               |
|----------------------------------------------|-----------------------------------------------------|
| $S_0$                                        | $\mathcal{N}(\mathbf{X}_i^{(t)}, 10)$               |
| $w_i$                                        | $\mathcal{N}(\mathbf{X}_i^{(t)}, 0.01)$             |
| $d, d_{\parallel}, d_{\perp_1}, d_{\perp_2}$ | $\mathcal{N}(\mathbf{X}_i^{(t)}, 1 \cdot 10^{-10})$ |
| $\psi$                                       | $\mathcal{N}(\mathbf{X}_i^{(t)}, 0.1) \bmod \pi$    |
| $\theta, \phi$                               | $\mathcal{N}(\mathbf{X}_i^{(t)}, 0.1)$              |
| $\kappa$                                     | $\mathcal{N}(\mathbf{X}_i^{(t)}, 0.01)$             |

Table 3: The proposal distributions  $q_i(\mathbf{X}^{(t+1)*} | \cdot)$  per model parameter with their default proposal standard deviations. For parameter usage and specification see table 3 in the article.

### 3 Default starting point

The following table lists the default initialization point when not initializing with an Maximum Likelihood Estimator.

| <b>Parameter</b>          | <b>Default starting value</b> |
|---------------------------|-------------------------------|
| $S_0$                     | $1 \cdot 10^4$                |
| $w_i$                     | 0.5                           |
| $d_{\parallel}$ (or $d$ ) | $1.7 \cdot 10^{-9}$           |
| $d_{\perp_1}$             | $1.7 \cdot 10^{-10}$          |
| $d_{\perp_2}$             | $1.7 \cdot 10^{-11}$          |
| $\theta, \phi, \psi$      | $\pi/2$                       |
| $\kappa$                  | 1                             |

Table 4: The default starting points for the MCMC sampler, used only when the sampler is not initialized with a maximum likelihood estimator.
